# Supplementary material for: Molecular Characterisation of M. kansasii Isolates by Whole-Genome Sequencing
Source: MDPI journal article supplement (doi:10.3390/pathogens12101249), 2023-10-17
Supplement: s1 [file s1]

**Supplementary file: Alignment of isolates with *M. kansasii* reference sequence showing mutation in drug resistant loci.**

**Alignment of *eis* gene between *M. kansasii* and NT16.**

|            |     |                                                     |     |
|------------|-----|-----------------------------------------------------|-----|
| NT16       | 1   | MYFLAAASFPDFMGRPANTWRS LVPADGAVVSCDGGDVVGMA LYDLRL  | 50  |
|            |     |                                                     |     |
| M.kansasii | 1   | MYFLAAASFPDFMGRPANTWRS LVPADGAVVSCDGGDVVGMA LYDLRL  | 50  |
| NT16       | 51  | TVPGGAVLPAAGLSFVAVAPTHRRRGLRLMCAELHRRISDSEYPMAALY   | 100 |
|            |     |                                                     |     |
| M.kansasii | 51  | TVPGGAVLPAAGLSFVAVAPTHRRRGLRLMCAELHRRISDSEYPMAALY   | 100 |
| NT16       | 101 | ASEGGIYGRFGYGPATVLQELTLDRRFARFHL DAPDGGRVRLVNPAEHRD | 150 |
|            |     |                                                     |     |
| M.kansasii | 101 | ASEGGIYGRFGYGPATVLQELTLDRRFARFHL DAPDGGRVRLVNPAEHRD | 150 |
| NT16       | 151 | EFAAIYERWRQQVPGGLARPDVLWEDALGECTNSPRGDTRLFAFLHTDGY  | 200 |
|            |     |                                                     |     |
| M.kansasii | 151 | EFAAIYERWRQQVPGGLARPDVLWEDALGECTNSPRGDTRLFAFLHTDGY  | 200 |
| NT16       | 201 | ALYRVDATDQKLARVEELRAVTADAHISLWRALLGLDSMERVRVITHPDD  | 250 |
|            |     |                                                     |     |
| M.kansasii | 201 | ALYRVDATDQKLARVEELRAVTADAHISLWRALLGLDSMERVRVITHPDD  | 250 |
| NT16       | 251 | PLPFLLTDTRLASPTFRQDGLWLRIMDIPAALEARGYCADLATVIGISDG  | 300 |
|            |     |                                                     |     |
| M.kansasii | 251 | PLPFLLTDTRLASPTFRQDGLWLRIMDIPAALEARGYCADLAMVIGVSDG  | 300 |
| NT16       | 301 | GRYRLQIRDGRALCSPTDASADVVLGRDVLGSLYLGVHRASTLAAANRLR  | 350 |
|            |     |                                                     |     |
| M.kansasii | 301 | GRYRLQIRDGRALCSPTDASADVVLGRDVLGSLYLGVHRASTLAAANRLR  | 350 |
| NT16       | 351 | TRDSGLVNRLDAAFASDVPAQTAFEF                          | 376 |
|            |     |                                                     |     |
| M.kansasii | 351 | TRDSGLVNRLDAAFASDVPAQTAFEF                          | 376 |

**Alignment of *embB* gene between *M. kansasii* and NT22.**

|            |     |                                                     |     |
|------------|-----|-----------------------------------------------------|-----|
| NT22       | 1   | MSMTTASRDVRVTRWVATIAGLVGFVLSVATPLL PVVQTTAMLNWPQNGQ | 50  |
|            |     |                                                     |     |
| M.kansasii | 1   | MSMTTASRDVRVTRWVATIAGLVGFVLSVATPLL PVVQTTAMLNWPQNGQ | 50  |
| NT22       | 51  | LNSVTAPLITLTPVDLTATVPCEVVRGMPPQGGVVLGTAPKQGKDANLQA  | 100 |
|            |     |                                                     |     |
| M.kansasii | 51  | LNSVTAPLITLTPVDLTATVPCEVVRGLPPQGGVVLGTAPKQGKDANLQA  | 100 |
| NT22       | 101 | MFVVVSSQRVDVTDNRNVILSVPRDQVVGAANAPGCSSIEVTSTHAGTFA  | 150 |
|            |     |                                                     |     |
| M.kansasii | 101 | MFVVVSSQRVDVTDNRNVILSVPRDQVVGGANAPGCSSIEVTSTHAGTFA  | 150 |
| NT22       | 151 | TFVGLKDPGGQPLRGGFPDPNLRPQIVGVFTDLTG PAPPGLKLSATIDTR | 200 |
|            |     |                                                     |     |
| M.kansasii | 151 | TFVGLKDPAGQPLRGGFPDPNLRPQIVGVFTDLTG PAPPGLKLSATIDTR | 200 |
| NT22       | 201 | FSTPTTTLKLLAMVGAIVATVVALVALWRDLRDLGHRMRRWIPQNWRFTT  | 250 |

|            |      |                                                              |      |
|------------|------|--------------------------------------------------------------|------|
| M.kansasii | 201  | <br>FSTTPTTLKLLAMVGAIVATVVALVALWRLDRLDGHMRMRWIPQNWRTFT       | 250  |
| NT22       | 251  | LLDGVVIFTFLLWHVIGANSSDDGYILGMARVADRAGYMSNYFRWFGSPE<br>     . | 300  |
| M.kansasii | 251  | LLDGVVIFAFLWVIGANSSDDGYILGMARVADRAGYMSNYFRWFGSPE             | 300  |
| NT22       | 301  | DPFGWYYNLLALMTHVSDASIWMRLPDLFAGLVCWLLLSREVLPRLGPAV<br>       | 350  |
| M.kansasii | 301  | DPFGWYYNLLALMTHVSDASIWMRLPDLFAGLVCWLLLSREVLPRLGPAV           | 350  |
| NT22       | 351  | TSSKAANWAAATVLLTAWMPFNGLRPEGIIALGSLVTYVLIERSMRYSR<br>        | 400  |
| M.kansasii | 351  | TSSKAANWAAATVLLTAWMPFNGLRPEGIIALGSLVTYVLIERSMRYSR            | 400  |
| NT22       | 401  | LTPAALAIIAAAFTLGVQPTGLIAVAALVAGGRPILRIFVKRHRLVGTLP<br>       | 450  |
| M.kansasii | 401  | LTPAALAIIAAAFTLGVQPTGLIAVAALVAGGRPILRIFVKRHRLVGTLP           | 450  |
| NT22       | 451  | LLSPMLAAGTIILTVVFADQTLSTVLEATRVRGKIGPSQAWYTENLRYYY<br>       | 500  |
| M.kansasii | 451  | LLSPMLAAGTIILTVVFADQTLSTVLEATRVRGKIGPSQAWYTENLRYYY           | 500  |
| NT22       | 501  | LILPTVDGSLSRRFGLITALCLFTAVFIMLRKRIPGVARGPAWRLMGV<br>         | 550  |
| M.kansasii | 501  | LILPTVDGSLSRRFGLITALCLFTAVFIMLRKRIPGVARGPAWRLMGV             | 550  |
| NT22       | 551  | IFATMFFLMFTPTKWWHHFGLFAAVGAAMAALTTVLVSPSVLRWSNRMA<br>        | 600  |
| M.kansasii | 551  | IFATMFFLMFTPTKWWHHFGLFAAVGAAMAALTTVLVSPSVLRWSNRMA            | 600  |
| NT22       | 601  | FLAAVLFMLALCWATTNGWWYVSSYGVPFNSAMPKIAGITVSTIFFALFA<br>       | 650  |
| M.kansasii | 601  | FLAAVLFMLALCWATTNGWWYVSSYGVPFNSAMPKIAGITVSTIFFALFA           | 650  |
| NT22       | 651  | IAAVYAAWLHFAPRGSGEGRLTRALTWPSQAPVPLAAGFMAVVFVASMVA<br>       | 700  |
| M.kansasii | 651  | IAAVYAAWLHFAPRGSGEGRLTRALTWPSQAPVPLAAGFMAVVFVASMVA           | 700  |
| NT22       | 701  | GIVRQYPTYSNOWSNLRAFVGGCGLADDVLVEPDPNNGFMTALPGDYGPL<br>     . | 750  |
| M.kansasii | 701  | GIVRQYPTYSNOWSNLRAFVGGCGLADDVLVEPDPNYGFMTALPGDYGPL           | 750  |
| NT22       | 751  | GPLGGTNPTGFTPNGVPEHTVAEAIVMKPNQPGTDYDWDAPTKLKTAGIN<br>       | 800  |
| M.kansasii | 751  | GPLGGTNPTGFTPNGVPEHTVAEAIVMKPNQPGTDYDWDAPTKLKTAGIN           | 800  |
| NT22       | 801  | GSTVPLPYQLDPAVPLAGTYTTGAQRQSKLASAWYLLPTPDDGHPLVAV<br>        | 850  |
| M.kansasii | 801  | GSTVPLPYQLDPAVPLAGTYTTGAQRQSKLASAWYLLPTPDDGHPLVAV            | 850  |
| NT22       | 851  | TAAGKIAGHSVLHGYTPGQTVVLEYARPGPGALVPAGRLVPDDLYGEQPK<br>       | 900  |
| M.kansasii | 851  | TAAGKIAGHSVLHGYTPGQTVVLEYARPGPGALVPAGRLVPDDLYGEQPK           | 900  |
| NT22       | 901  | AWRNLRFARDKMPADAVAVRVVAEDLSLTPEDWIAVTPPRPDLRSLQEY<br>        | 950  |
| M.kansasii | 901  | AWRNLRFARDKMPADAVAVRVVAEDLSLTPEDWIAVTPPRPDLRSLQEY            | 950  |
| NT22       | 951  | VGSTQPVLLDWAVGLAFPCQQPMLHVNGVTEIPKFRITPDYNAKKLDTDT<br>       | 1000 |
| M.kansasii | 951  | VGSTQPVLLDWAVGLAFPCQQPMLHVNGVTEIPKFRITPDYNAKKLDTDT           | 1000 |
| NT22       | 1001 | WEDGVNGLLGITDLLLLRAHVMATYLSRDWARDWGSRLRKFDTLVDAPPAQ          | 1050 |

|            |      |                                                         |      |
|------------|------|---------------------------------------------------------|------|
| M.kansasii | 1001 | <br>WEDGVNGGLLGITDLLLLRAHVMATYLSRDWARDWGSLRKFDTLVDAPPAQ | 1050 |
| NT22       | 1051 | LDLGTATRSGLWSPGKIRIGP                                   | 1071 |
| M.kansasii | 1051 | <br>LDLGTATRSGLWSPGKIRIGP                               | 1071 |

### Alignment of *aftB* gene between *M. kansasii* and NT12.

|            |     |                                                     |     |
|------------|-----|-----------------------------------------------------|-----|
| M.kansasii | 1   | MGPLLPSASSRFKALRASALARRPAVRRARWPVFPYEPVVRISLWVSVAV  | 50  |
| NT12       | 1   | -----                                               | 0   |
| M.kansasii | 51  | VCMLFGWGAWQRRWIADDGLIVLRTVRNLLAGNGPVFNMGERVEANTSTV  | 100 |
| NT12       | 1   | -----MGERVEANTSTA                                   | 12  |
| M.kansasii | 101 | WTYLLYVASWVGGMRLLEYVALAVALMLSLLGAALLMLGTGRLYAPSLRG  | 150 |
| NT12       | 13  | WTYLLYAASWVGGMRLLEYVALAVALVLSLLGVALLMLGTGRLYAPSLRG  | 62  |
| M.kansasii | 151 | RRAIMLPAGALVYIAVPPARDFATSGLESGVLTYLGLLWMMVCWAQPL    | 200 |
| NT12       | 63  | RRAIMLPAGALVYIAVPPARDFATSGLESGVLTYLGLLWMLMVCWAQPL   | 112 |
| M.kansasii | 201 | RVRPHGRVFIGALAFVAGCSVLVRPELALMGGLALIMMLVAARTWRRRVL  | 250 |
| NT12       | 113 | RVRPHGRVFIGALAFVAGCSVLVRPELALMGGLALIMMLVAARTWRRRVL  | 162 |
| M.kansasii | 251 | IVVAGGFLPVAYQIFRMGYALLVPGTALAKDAAGDKWSQGMYYLSNFNR   | 300 |
| NT12       | 163 | IVVAGGLLPVAYQIFRMGYALLVPGTALAKDAAGDKWSQGMYYLSNFNR   | 212 |
| M.kansasii | 301 | PYALWVPIVLLVPLGLVLM LARRRPSFLRPMVAPDYGRVARAVQSPAAVV | 350 |
| NT12       | 213 | PYALWVPIVLLVPLGLVLM LARRRPSFLRPVAPDYGRLARAVQSPAAVV  | 262 |
| M.kansasii | 351 | AFMIGSGLLQALYWIRQGGDFMHGRVLLAPLFCLLAPVAVIPVLLPDGKD  | 400 |
| NT12       | 263 | AFMVGSGLLQALYWIRQGGDFMHGRVLLAPLFCLLAPVAVIPLSLPDGRD  | 312 |
| M.kansasii | 401 | FSKETGYWLAGGVSILWLGWAGWSLWAANSPGMGDDATHVTTYTGIVDERR | 450 |
| NT12       | 313 | FSKETGYWLAGVVSILWLGWAGWSLWAANSPGMGDDATHVTTYTGIVDERR | 362 |
| M.kansasii | 451 | FYAQATGHAHPLTAADYLDYPRMAAVLTALDNTPEGALLPSGNYNQWDL   | 500 |
| NT12       | 363 | FYAQATGHAHPLTAADYLDYPRMAAVLTALDNTPDGALLPSGNYNQWDL   | 412 |
| M.kansasii | 501 | VPMIPPGTAPGIPATQKPQHAVFFTNLGMGMNVGLDVRVIDQIGLANPL   | 550 |
| NT12       | 413 | VPMIPPGTAPGIPASQKPQHAVFFTNLGMGMNVGLDVRVLDQIGLANPL   | 462 |
| M.kansasii | 551 | AQHTERLKHGRIGHDKNLFDPDWIADGPWVKWYPGVPGYLDPAWVAQAEA  | 600 |
| NT12       | 463 | AQHTERLKHGRIGHDKNLFDPDWIADGPWVKWYPGVPGYLDPAWVAQAEA  | 512 |
| M.kansasii | 601 | ALKCPATQAVLNSVRAPLTLLRRFVSNVHSFEFTRYRIDRVPLNELIRCG  | 650 |

|            |     |                                                   |     |
|------------|-----|---------------------------------------------------|-----|
| NT12       | 513 | ALRCPATQAVLNSVRAPLTVRRFVSNVVSFEFTRYRIDRVPLNELIRCG | 562 |
| M.kansasii | 651 | LEVPDVSPAPARE                                     | 663 |
|            |     | .                                                 |     |
| NT12       | 563 | LEVPDVPPAPARE                                     | 575 |

### Alignment of *rrl* loci between *M. kansasii* and NT47.

Drug resistant location with A2089G mutation found in one of our isolate NT47 results highlighted in blue rectangle, mutation is marked in red color.

|            |     |                                                    |     |
|------------|-----|----------------------------------------------------|-----|
| M.kansasii | 1   | TTGTAAGTGTCTAAGGGCGCATGGTGGATGCCTTGGCATCGAGAGCCGAT | 50  |
|            |     |                                                    |     |
| NT47       | 1   | TTGTAAGTGTCTAAGGGCGCACGGTGGATGCCTTGGCATCGAGAGCCGAT | 50  |
| M.kansasii | 51  | GAAGGACGTGGGAGGCTGCGATAAGCCTCGGGGAGCTGTCAACCGAGCGT | 100 |
|            |     |                                                    |     |
| NT47       | 51  | GAAGGACGTGGGAGGCTGCGATAAGCCTCGGGGAGCTGTCAACCGAGCGT | 100 |
| M.kansasii | 101 | GGATCCGAGGATTTCCGAATGGGGAAACCCAGCACGAGTGATGTCGTGTT | 150 |
|            |     |                                                    |     |
| NT47       | 101 | GGATCCGAGGATTTCCGAATGGGGAAACCCAACACGAGTTATGTCGTGTT | 150 |
| M.kansasii | 151 | ACCCGCATCTGAATATATAGGGTGCGGGAGGGAACGCGGGGAAGTGAAAC | 200 |
|            |     |                                                    |     |
| NT47       | 151 | ACCCGCATCTGAATATATAGGGTGCGGGAGGGAACGCGGGGAAGTGAAAC | 200 |
| M.kansasii | 201 | ATCTCAGTACCCGTAGGAGAAGAAAACAAAAGTGATTCCGTAAGTAGTGG | 250 |
|            |     | .                                                  |     |
| NT47       | 201 | ATCTTAGTACCCGTAGGAGAAGAAAACAAAAGTGATTCCGTAAGTAGTGG | 250 |
| M.kansasii | 251 | CGAGCGAACGCGGAACATGGCTAAACCGCACGCATGGGTAACCGGGTAGG | 300 |
|            |     |                                                    |     |
| NT47       | 251 | CGAGCGAACGCGGAACATGGCTAAACCGCACGCATGGGTAACCGGGTAGG | 300 |
| M.kansasii | 301 | GGTTGTGTGTGCGGGGTTGTGGGATCGATACGTCTCAGCTCTACCCGGCT | 350 |
|            |     |                                                    |     |
| NT47       | 301 | GGTTGTGTGTGCGGGGTTGTGGGATCGATACGTCTCAGCTCTACCCGGCT | 350 |
| M.kansasii | 351 | GAGGGGCAGTCAGAAAGTGTCGTGGTTAACGGAAGTGGCCTGGGATGGTC | 400 |
|            |     |                                                    |     |
| NT47       | 351 | GAGGGGCAGTCAGAAAGTGTCGTGGTTAACGGAAGTGGCCTGGGATGGTC | 400 |
| M.kansasii | 401 | TGCCGTAGACGGTGAGAGCCCGGTACGTGAAAACCCGGCACCTGCCTTGT | 450 |
|            |     |                                                    |     |
| NT47       | 401 | TGCCGTAGACGGTGAGAGCCCGGTACGTGAAAACCCGGCACCTGCCTTGT | 450 |
| M.kansasii | 451 | ATCAATTCCCGAGTAGCAGCGGGCCCGTGGAATCTGCTGTGAATCTGCCG | 500 |
|            |     |                                                    |     |
| NT47       | 451 | ATCAATTCCCGAGTAGCAGCGGGCCCGTGGAATCTGCTGTGAATCTGCCG | 500 |
| M.kansasii | 501 | GGACCACCCGGTAAGCCTAAATACTCCTCGATGACCGATAGCGGAATAGT | 550 |
|            |     |                                                    |     |
| NT47       | 501 | GGACCACCCGGTAAGCCTAAATACTCCTCGATGACCGATAGCGGAATAGT | 550 |
| M.kansasii | 551 | ACCGTGAGGGAATGGTGAAAAGTACCCCGGAGGGGAGTGAAAGAGTACC  | 600 |
|            |     | .     .     .    .                                 |     |
| NT47       | 551 | ACCGTGAGGGAATGGTGAAAAGTACCCCGAAGGGGAGTGAAATAGAACT  | 600 |
| M.kansasii | 601 | TGAAACCGTGTGCCTACAATCCGTCAGAGCCCTTTCGTGGGGTGATGGCG | 650 |
|            |     | .    .    .    .    .                              |     |

|            |      |                                                     |      |
|------------|------|-----------------------------------------------------|------|
| NT47       | 601  | TGAAACCGTGTGCTTACAAGTAGTCAGAGCCCGTTAAT-GGGTGATGGCG  | 649  |
| M.kansasii | 651  | TGCCTTTTGAAGAATGAGCCTGCGAGTCAGGGACATGTCGCGAGGTAAAC  | 700  |
|            |      | .       .                                           |      |
| NT47       | 650  | TGCCTTTTGTAGAAATGAACCTGCGAGTCAGGGACATGTCGCGAGGTAAAC | 699  |
| M.kansasii | 701  | CCGTGCGGGGTAGCCGCAGCGAAAGCGAGTCTGAATAGGGCGTATCGCGC  | 750  |
|            |      | .       .                                           |      |
| NT47       | 700  | CCGTGCGGGGTAGCCGTAGCGAAAGCGAGTCTGAATAGGGCGTATCGCGC  | 749  |
| M.kansasii | 751  | GCGAGCGTGTGTAGTGGCGTGTCTGGACCCGAAGCGGAGTGATCTACCC   | 800  |
|            |      |                                                     |      |
| NT47       | 750  | GCGAGCGTGTGTAGTGGCGTGTCTGGACCCGAAGCGGAGTGATCTACCC   | 799  |
| M.kansasii | 801  | ATGGCCAGGGTGAAGCGCGGGTAAGACCGCGTGGAGGCCCGAACCACCTT  | 850  |
|            |      |                                                     |      |
| NT47       | 800  | ATGGCCAGGGTGAAGCGCGGGTAAGACCGCGTGGAGGCCCGAACCACCTT  | 849  |
| M.kansasii | 851  | AGGTTGAAGACTGAGGGGATGAGCTGTGGGTAGGGGTGAAAGGCCAATCA  | 900  |
|            |      |                                                     |      |
| NT47       | 850  | AGGTTGAAGACTGAGGGGATGAGCTGTGGGTAGGGGTGAAAGGCCAATCA  | 899  |
| M.kansasii | 901  | AACTCCGTGATAGCTGGTTCTCCCCGAAATGCATTTAGGTGCAGCGTTGC  | 950  |
|            |      |                                                     |      |
| NT47       | 900  | AACTCCGTGATAGCTGGTTCTCCCCGAAATGCATTTAGGTGCAGCGTTGC  | 949  |
| M.kansasii | 951  | GTGTTTCACCACGGAGGTAGAGCTACTGGATGGCCGATGGGCCCCACTAG  | 1000 |
|            |      |                                                     |      |
| NT47       | 950  | GTGTTTCACCACGGAGGTAGAGCTACTGGATGGCCGATGGGCCCCACTAG  | 999  |
| M.kansasii | 1001 | GTTACTGACGTGAGCCAAACTCCGAATGCCGTGGTGTATAGCGTGGCAGT  | 1050 |
|            |      |                                                     |      |
| NT47       | 1000 | GTTACTGACGTGAGCCAAACTCCGAATGCCGTGGTGTATAGCGTGGCAGT  | 1049 |
| M.kansasii | 1051 | GAGACGGCGGGGGATAAGCTCCGTACGTGCGAAAGGGAAACAGCCCAGATC | 1100 |
|            |      | .                                                   |      |
| NT47       | 1050 | GAGACGGCGGGGGATAAGCTCCGTACGTGCGAAAGGGAAACAGCCCAGACC | 1099 |
| M.kansasii | 1101 | GCCGGCTAAGGCCCCAAAGCGTGTGCTAAGTGGGAAAGGATGTGCAGTCG  | 1150 |
|            |      | .   .       .                                       |      |
| NT47       | 1100 | ACCAGCTAAGGTCCCAAAGCGTGTGCTAAGTGGGAAAGGATGTGCAGTCG  | 1149 |
| M.kansasii | 1151 | CAGAGACAACCAGGAGGTTGGCTTAGAAGCAGCCACCCTTGAAAGAGTGC  | 1200 |
|            |      | .       .                                           |      |
| NT47       | 1150 | CAGAGACAACCAGGATGTTGGCTTAGAAGCAGCCATCATTTAAAGAGTGC  | 1199 |
| M.kansasii | 1201 | GTAATAGCTCACTGGTCAAGTGATTGTGCGCCGATAATGTAGCGGGGCTC  | 1250 |
|            |      | .   .     .     .                                   |      |
| NT47       | 1200 | GTAATAGCTCACTAGTCGAGTGACACTGCGCCGAAAATGTACCGGGGCTC  | 1249 |
| M.kansasii | 1251 | AAGCACACCGCCGAAGCCGCGACAACCGCAAGGTTGGGTAGGGGAGCGTC  | 1300 |
|            |      |                                                     |      |
| NT47       | 1250 | AAGCACACCGCCGAAGCCGCGACAACCGCAAGGTTGGGTAGGGGAGCGTC  | 1299 |
| M.kansasii | 1301 | CCTCATTCAGCGAAGCTGCCGGGTGACCGGTGGTGGAGGATGGGGGAGTG  | 1350 |
|            |      |                                                     |      |
| NT47       | 1300 | CCTCATTCAGCGAAGCTGCCGGGTGACCGGTGGTGGAGGATGGGGGAGTG  | 1349 |
| M.kansasii | 1351 | AGAATGCAGGCATGAGTAGCGATAAGGCAAGTGAGAACCTTGCCCCCCGA  | 1400 |
|            |      |                                                     |      |
| NT47       | 1350 | AGAATGCAGGCATGAGTAGCGATAAGGCAAGTGAGAACCTTGCCCCCCGA  | 1399 |
| M.kansasii | 1401 | AAGACCAAGGGTTCCTGGGCCAGGCCAGTCCGCCCAGGGTGAGTCGGGAC  | 1450 |
|            |      |                                                     |      |

|            |      |                                                     |      |
|------------|------|-----------------------------------------------------|------|
| NT47       | 1400 | AAGACCAAGGGTTCCTGGGCCAGGCCAGTCCGCCCAGGGTGAGTCGGGAC  | 1449 |
| M.kansasii | 1451 | CTAAGGCGAGGCCGACAGGCGTAGTCGATGGACAACGGGTGATATTCCC   | 1500 |
|            |      |                                                     |      |
| NT47       | 1450 | CTAAGGCGAGGCCGATAGGCGTAGGCGATGGATAACAGGTTGATATTCT   | 1499 |
| M.kansasii | 1501 | GTACCCGTGTGTGGGCGCCCGTGATGAATCAGCGGTACTAACCACCCAAA  | 1550 |
|            |      |                                                     |      |
| NT47       | 1500 | GTACCCGTGTGTGGGCGCCCGTGATGAATCAGCGGTACTAACCACCCAAA  | 1549 |
| M.kansasii | 1551 | ACCGGATCGATCACTCCCCTTCGGGGGCGTGAGGTCTGGGGCTGCGTGG   | 1600 |
|            |      |                                                     |      |
| NT47       | 1550 | ACCGGATCGATCACTCCCCTTCGGGGGCGTGAGGTCTGGGGCTGCGTGG   | 1599 |
| M.kansasii | 1601 | AGCCTTCGCTGGTAGTAGTCAAGCGATGGGGTGACGCAGGAAGGCAGCCG  | 1650 |
|            |      |                                                     |      |
| NT47       | 1600 | AGCCTTCGCTGGTAGTAGTCAAGCGATGGGGTGACGCAGGAAGGCAGCCG  | 1649 |
| M.kansasii | 1651 | TACCAGTCAGTGGTAATACTGGGGCAAGCCAGTAGGGAGAGCGATAGGCA  | 1700 |
|            |      |                                                     |      |
| NT47       | 1650 | TACCAGTCAGTGGTAATACTGGGGCAAGCCAGTAGGGAGAGCGATAGGCA  | 1699 |
| M.kansasii | 1701 | AATCCGTCGCTCACAAATCCTGAGAGGTGACGCATAGCCGATTGAGGCGA  | 1750 |
|            |      |                                                     |      |
| NT47       | 1700 | AATCCGTCGCTCACAAATCCTGAGAGGTGACGCATAGCCGATTGAGGCGA  | 1749 |
| M.kansasii | 1751 | ATTCGGTGATCCTCTGCTGCCAAGAAAAGCCTCTAGCGAGCACACACACG  | 1800 |
|            |      |                                                     |      |
| NT47       | 1750 | ATTCGGTGATCCTCTGCTGCCAAGAAAAGCCTCTAGCGAGCACACACACG  | 1799 |
| M.kansasii | 1801 | GCCCGTACCCCAAACCGACACAGGTGGTCAGGTAGAGAATACCAAGGCGT  | 1850 |
|            |      |                                                     |      |
| NT47       | 1800 | GCCCGTACCCCAAACCGACACAGGTGGTCAGGTAGAGAATACCAAGGCGT  | 1849 |
| M.kansasii | 1851 | ACGAGATAACTATGGTTAAGGAACTCGGCAAAATGCCCCGTAACCTCGG   | 1900 |
|            |      |                                                     |      |
| NT47       | 1850 | ACGAGATAACTATGGTTAAGGAACTCGGCAAAATGACCCCGTAACCTCGG  | 1899 |
| M.kansasii | 1901 | GAGAAGGGGGACCGGAATACCGTGAACACCCTTGCGGTGGGAGCGGGATT  | 1950 |
|            |      |                                                     |      |
| NT47       | 1900 | GAGAAGGGGGACCGGAATACCGTGAACACCCTTGCGGTGGGAGCGGGATT  | 1949 |
| M.kansasii | 1951 | CGGTTCGCAGAAACCGAGTGAAGCGACTGTTTACTAAAAACACAGGTCCG  | 2000 |
|            |      |                                                     |      |
| NT47       | 1950 | CGGTTCGCAGAAACCGAGTGAAGCGACTGTTTACTAAAAACACAGGTCCG  | 1999 |
| M.kansasii | 2001 | TGCGAAGTCGCAAGACGATGTATACGGACTGACGCCTGCCCAGGTGCTGGA | 2050 |
|            |      |                                                     |      |
| NT47       | 2000 | TGCGAAGTCGCAAGACGATGTATAGGGCTGACGCCTGCCCAGGTGCTGGA  | 2049 |
| M.kansasii | 2051 | AGGTTAAGAGGACCCGTTAACCCGCAAGGGTGAAGCGGAGAATTTAAGCC  | 2100 |
|            |      |                                                     |      |
| NT47       | 2050 | AGGTTAAGAGGACCCGTTAACCCGCAAGGGTGAAGCGGAGAATTTAAGCC  | 2099 |
| M.kansasii | 2101 | CCAGTAAACGGCGGTGGTAATAACCATCCTAAGGTAGCGAAATTCCT     | 2150 |
|            |      |                                                     |      |
| NT47       | 2100 | CCAGTAAACGGCGGCCGTAATAACGGTCCTAAGGTAGCGAAATTCCT     | 2149 |
| M.kansasii | 2151 | TGTCGGGTAAGTTCCGACCTGCACGAATGGCGTAACGACTTCTCAACTGT  | 2200 |
|            |      |                                                     |      |
| NT47       | 2150 | TGTCGGGTAAGTTCCGACCCGCACGAAAGGCGTAACGACTTCTCAACTGT  | 2199 |
| M.kansasii | 2201 | CTCAACCATAGACTCGGCGAAATTGCACTACGAGTAAAGATGCTCGTTAC  | 2250 |
|            |      |                                                     |      |

|            |      |                                                     |      |
|------------|------|-----------------------------------------------------|------|
| NT47       | 2200 | CTCAACCATAGACTCGGCGAAATTGCACTACGAGTAAAGATGCTCGTTAC  | 2249 |
| M.kansasii | 2251 | GCGCGGCAGGACGAAAAGACCCCGGGACCTTCACTACAACCTGGTATTGG  | 2300 |
|            |      |                                                     |      |
| NT47       | 2250 | GCGCGGCAGGACGAAAAGACCCCGGGACCTTCACTACAACCTGGTATTGG  | 2299 |
| M.kansasii | 2301 | TGTTTCGGTACGGTTTGTGTAGGATAGGTGGGAGACTGTGAAACCTCAACG | 2350 |
|            |      |                                                     |      |
| NT47       | 2300 | TGTTTCGGTACGGTTTGTGTAGGANNNNNGGAGACTGTGAAACCTCAACG  | 2349 |
| M.kansasii | 2351 | CCAGTTGGGGTGGAGTCGTTGTTGAAATACCACTCTGATCGTATTGGACA  | 2400 |
|            |      |                                                     |      |
| NT47       | 2350 | CCAGTTGGGGTGGAGTCGTTGTTGAAATACCACTCTGATCGTATTGGACA  | 2399 |
| M.kansasii | 2401 | CCTAACGTCGAACCCTGAATCGGGTTCACGGACAGTGCCTGGCGGGTAGT  | 2450 |
|            |      |                                                     |      |
| NT47       | 2400 | CCTAACGTCGAACCCTGAATCGGGTTCACGGACAGTGCCTGGCGGGTAGT  | 2449 |
| M.kansasii | 2451 | TTAACTGGGGCGGTTGCCTCCTAAAATGTAACGGAGGCGCCAAAGGTTT   | 2500 |
|            |      | .                                                   |      |
| NT47       | 2450 | TTGACTGGGGCGGTCGCCTCCTAAAGAGTAACGGAGGCGCTCAAAGGTTT  | 2499 |
| M.kansasii | 2501 | CCTCAACCTGGACGGCAATCAGGTGGCGAGTGTAAGTGCACAAGGGAGCT  | 2550 |
|            |      |                                                     |      |
| NT47       | 2500 | CCTCAACCTGGACGGCAATCAGGTGGCGAGTGTAAGTGCACAAGGGAGCT  | 2549 |
| M.kansasii | 2551 | TGACTGCGAGACCTACAAGTCAAGCAGGGACGAAAGTCGGGACTAGTGAT  | 2600 |
|            |      |                                                     |      |
| NT47       | 2550 | TGACTGCGAGACTTACAAGTCGAGCAGGGTCGAAAGTCGGGACTAGTGAT  | 2599 |
| M.kansasii | 2601 | CCGGCACCTCTGAGTGGAAGGGGTGTCGCTCAACGGATAAAAGGTACCCC  | 2650 |
|            |      |                                                     |      |
| NT47       | 2600 | CCGGCACCTCTGAGTGGAAGGGGTGTCGCTCAACGGATAAAAGGTACCCC  | 2649 |
| M.kansasii | 2651 | GGGGATAACAGGCTGATCTTCCCCAAGAGTCCATATCGACGGGATGGTTT  | 2700 |
|            |      |                                                     |      |
| NT47       | 2650 | GGGGATAACAGGCTTATCTCCCCAAGAGTTCACATCGACGGGAGGTTT    | 2699 |
| M.kansasii | 2701 | GGCACCTCGATGTCGGCTCGTCGCATCCTGGGGCTGGAGCAGGTCCCAAG  | 2750 |
|            |      |                                                     |      |
| NT47       | 2700 | GGCACCTCGATGTCGGCTCATCGCATCCTGGGGCTGTAGTCGGTCCCAAG  | 2749 |
| M.kansasii | 2751 | GGTTGGGCTGTTTCGCCCATTAAGCGGCACGCGAGCTGGGTTTAGAACGT  | 2800 |
|            |      |                                                     |      |
| NT47       | 2750 | GGTTGGGCTGTTTCGCCCATTAAGCGGTACGCGAGCTGGGTTTACAACGT  | 2799 |
| M.kansasii | 2801 | CGTGAGACAGTTTCGGTCTCTATCCGCCGCGCGCTCAGAAGCTTGAGGAA  | 2850 |
|            |      |                                                     |      |
| NT47       | 2800 | CGTGAGACAGTTTCGGTCCCTATCCGCCGCGCGCTCAGAAGCTTGAGGAA  | 2849 |
| M.kansasii | 2851 | ACCTGTCCCTAGTACGAGAGGACCGGGACGGACGAACCTCTAGTGCACCA  | 2900 |
|            |      |                                                     |      |
| NT47       | 2850 | ACCTGTCCCTAGTACGAGAGGACCGGGATGGACATACCTCTGGTGTACCA  | 2899 |
| M.kansasii | 2901 | GTTGTCCCACCAGGGGCACCGCTGGATAGCTACGTTTCGGACAGGATAACC | 2950 |
|            |      |                                                     |      |
| NT47       | 2900 | GTTGTCCCACCAGGGGCACCGCTGGATAGCTACGTTTCGGACAGGATAACC | 2949 |
| M.kansasii | 2951 | GCTGAAAGCATCTAAGCGGGAAACCTTCTCCAAGATCAGGCTTCTCACCC  | 3000 |
|            |      |                                                     |      |
| NT47       | 2950 | GCTGAAAGCATCTAAGCGGGAAACCTTCTCCAAGATCAGGCTTCTCACCC  | 2999 |
| M.kansasii | 3001 | ACTTGGTGGGATAAGGCCCGCAGAACACGGGTTTCGATAGGCCAGACC    | 3050 |
|            |      |                                                     |      |

|            |      |                                                    |      |
|------------|------|----------------------------------------------------|------|
| NT47       | 3000 | ACTTGGTGGGATAAGGCCCCCGCAGAACACGGGTTCGATAGGCCAGACC  | 3049 |
| M.kansasii | 3051 | TGGAAGCTCAGTAATGAGTGAAGGGAAGTGGCACTAACCGGCCGAAAAGT | 3100 |
|            |      |                                                    |      |
| NT47       | 3050 | TGGAAGCTCAGTAATGAGTGAAGGGAAGTGGCACTAACCGGCCGAAAAGT | 3099 |
| M.kansasii | 3101 | TACCAACACAAATAATCG                                 | 3118 |
|            |      |                                                    |      |
| NT47       | 3100 | TACCAACACAAATAATCG                                 | 3117 |
